# Supplementary material
Source: PubMed Central journal article supplement (PMC4836219)
Supplement: MCB.01030-15_zmb999101203so1.pdf [file MCB.01030-15_zmb999101203so1.pdf]

## SUPPLEMENTARY FIGURE LEGENDS

**Supplementary Figure 1:** Overexpression of *H19* or miR-675 inhibits cell proliferation. Caco-2 cells were transfected with the *H19* expression vector or pre-miR-675-3p, and cell growth was measured 48 h after transfection. *Left panel:* cell growth as measured by MTT assay; *right panel:* cell number. Values are means  $\pm$  SEM of data from three independent experiments. \* $P < 0.05$  compared with vector.

**Supplementary Figure 2:** Inhibition of the miRNA let-7 does not alter expression levels of ZO-1 and E-cadherin. Caco-2 cells were transfected with specific antagomirs (directed at let-7a and let-7b) or with control oligomers; the levels of proteins ZO-1, E-cadherin, Myc (positive control), and GAPDH (loading control) were examined 48 h after transfection by Western blot analysis. Three experiments were performed that showed similar results.

**Supplementary Figure 3:** Endogenous HuR associates with *H19* in Caco-2 cells. **A)** The levels of *H19* and other lncRNAs (*HULC* and *PTENP1*) in samples immunoprecipitated by using anti-HuR antibody (Ab) or control IgG were measured by Q-PCR analysis. Values are means  $\pm$  SEM of data from triplicate experiments. \* $P < 0.05$  compared with IgG. **B)** Levels of total input lncRNAs.

**Supplementary Figure 4:** Levels of *ZO-1* and *E-cad* mRNAs in cells overexpressing both *H19* and HuR. Cells were co-transfected with the *H19* expression vector and HuR expression vector, and RNA was harvested 48 h after the co-transfection. Values are means  $\pm$  SEM of data from triplicate experiments. \* $P < 0.05$  compared with cells transfected with control vector (Vector). <sup>+</sup> $P < 0.05$  compared with cells transfected with the *H19* expression vector alone.
