# Supplementary material
Source: PubMed Central journal article supplement (PMC4836219)

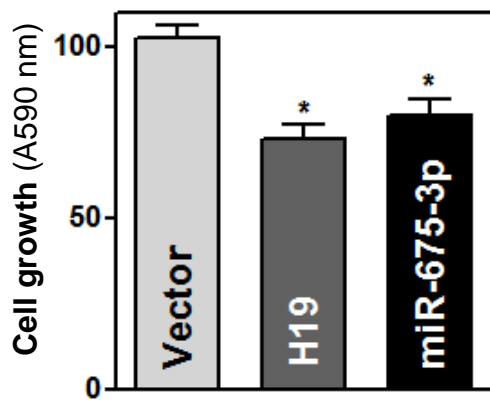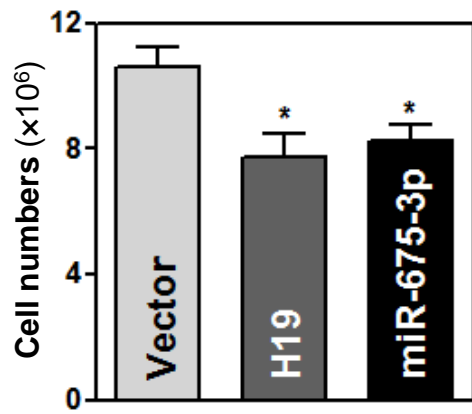

Supplemental Figure 1

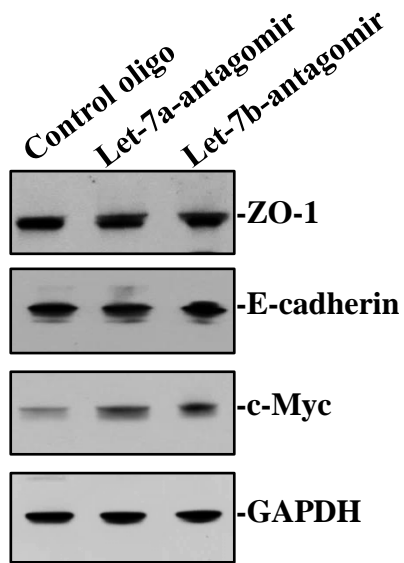

**Supplemental Figure 2**

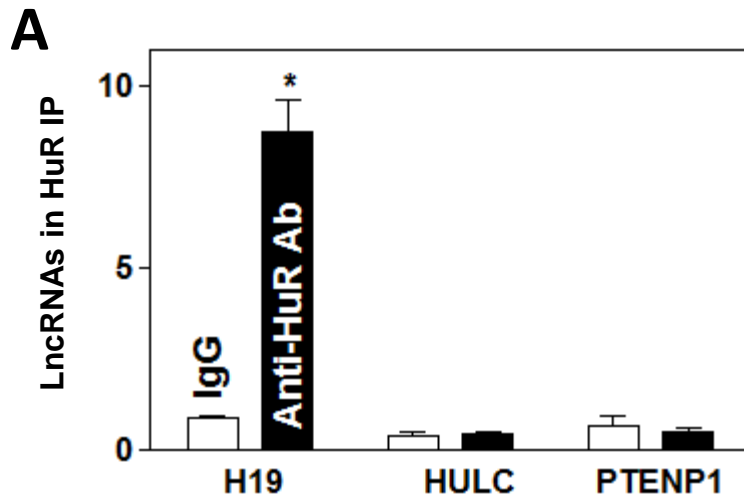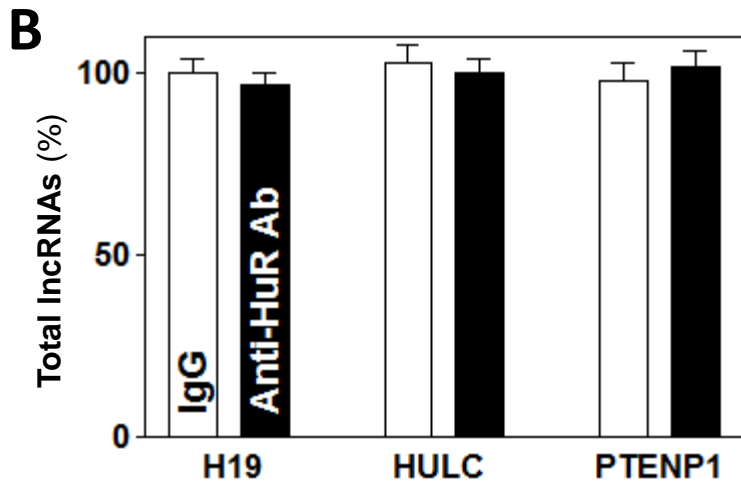

Supplemental Figure 3

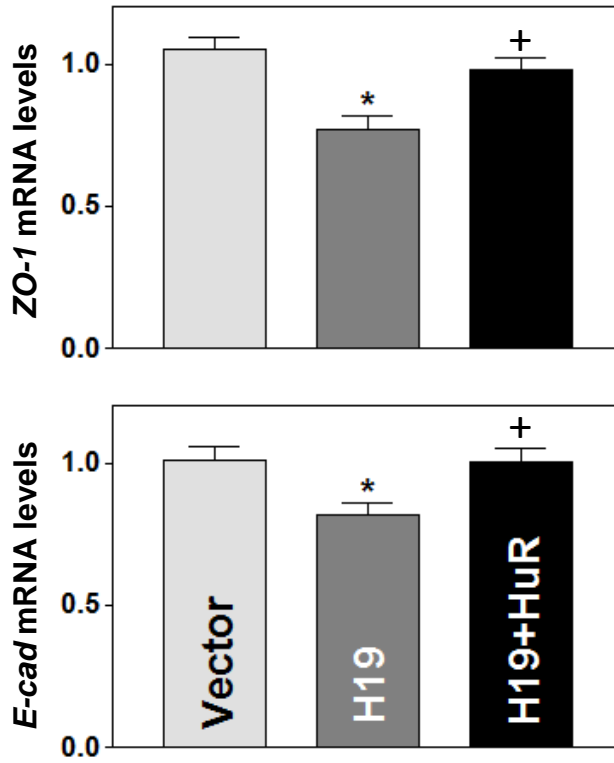

**Supplemental Figure 4**

Supplement: MCB.01030-15_zmb999101203so2.pdf [file MCB.01030-15_zmb999101203so2.pdf]
